# Supplementary material for: Mn–Fe bi-metal oxides in situ created on metal wire mesh as monolith catalysts for selective catalytic reduction of NO with NH3
Source: Royal Society of Chemistry journal article supplement (doi:10.1039/c7ra05007k), 2017-01-01
Supplement: c7ra05007k1.pdf [file c7ra05007k1.pdf]

*Electronic Supplementary Information (ESI)*

**Mn-Fe bi-metal oxides *in-situ* created on metal wire mesh as monolith catalysts for selective catalytic reduction of NO with NH<sub>3</sub>**

*Jie Liu, Lin Kang, Hongrui Li, Phornphimon Maitarad, Jianping Zhang, Liyi Shi  
and Dengsong Zhang\**

*Research Center of Nano Science and Technology, Shanghai University, Shanghai 200444, China.*

*Tel: +86-21-66137152; E-mail: dszhang@shu.edu.cn*

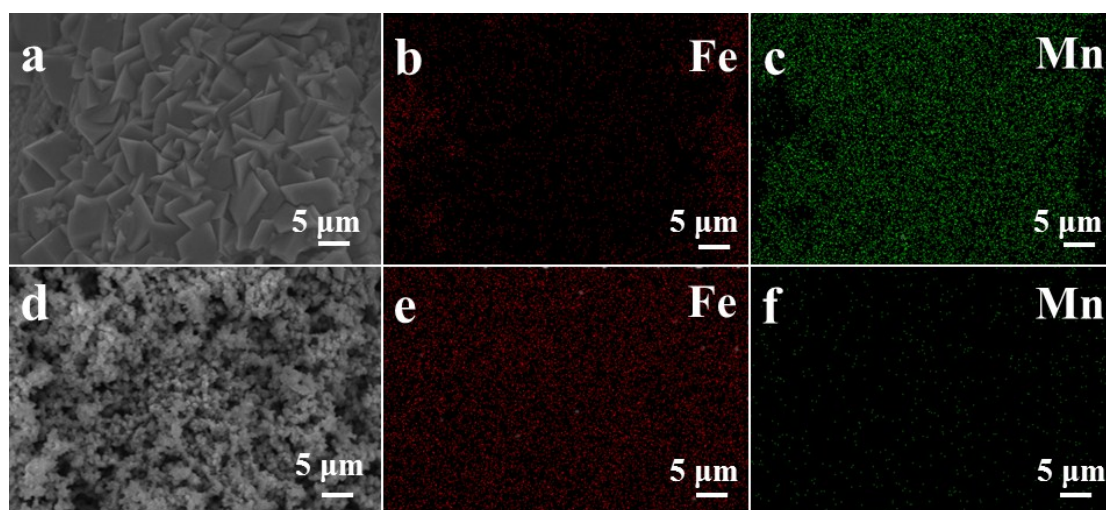

**Fig. S1** (a-c)SEM images and elemental mappings results of Mn-Fe(2:1)@Fe WM monolithic catalyst; (d-f)SEM images and elemental mappings results of Mn-Fe(1:2)@Fe WM monolithic catalyst.

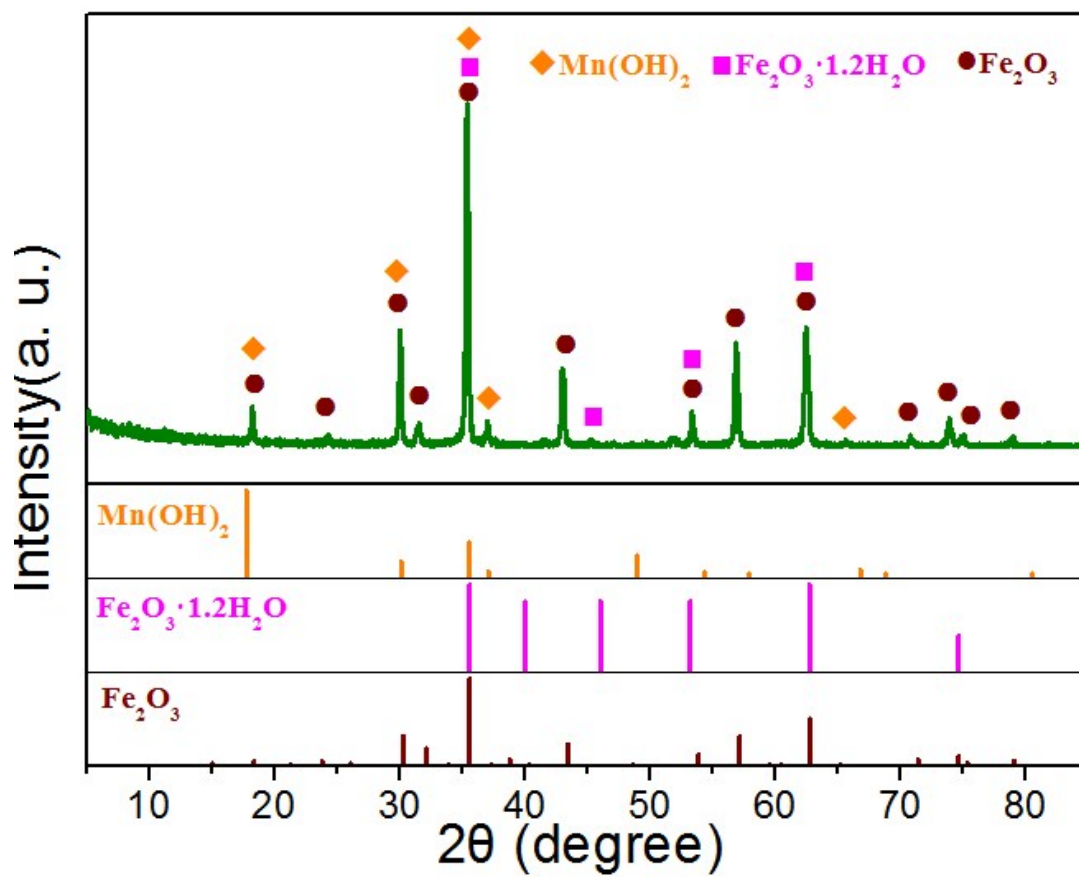

**Fig. S2** XRD patterns of the precursor powders obtained from the Mn-Fe@Fe WM catalysts without calcination.

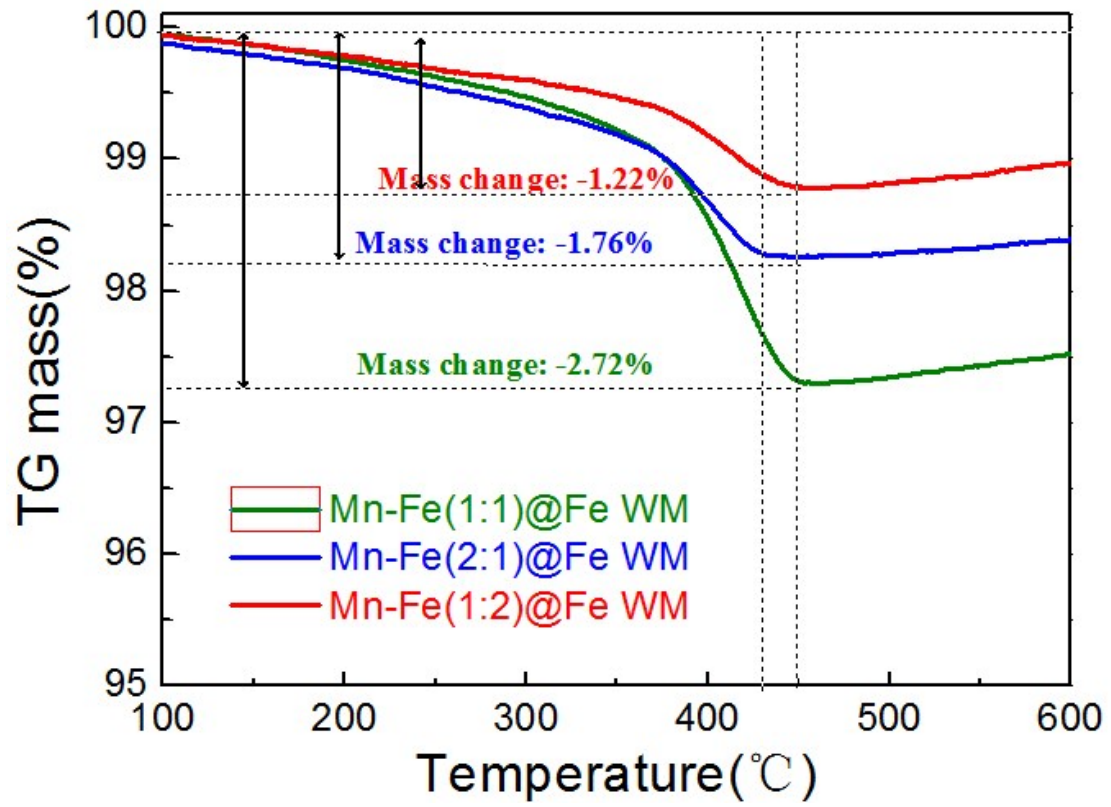

Fig. S3 TGA curves of the monolith precursors through a hydrothermal reaction.

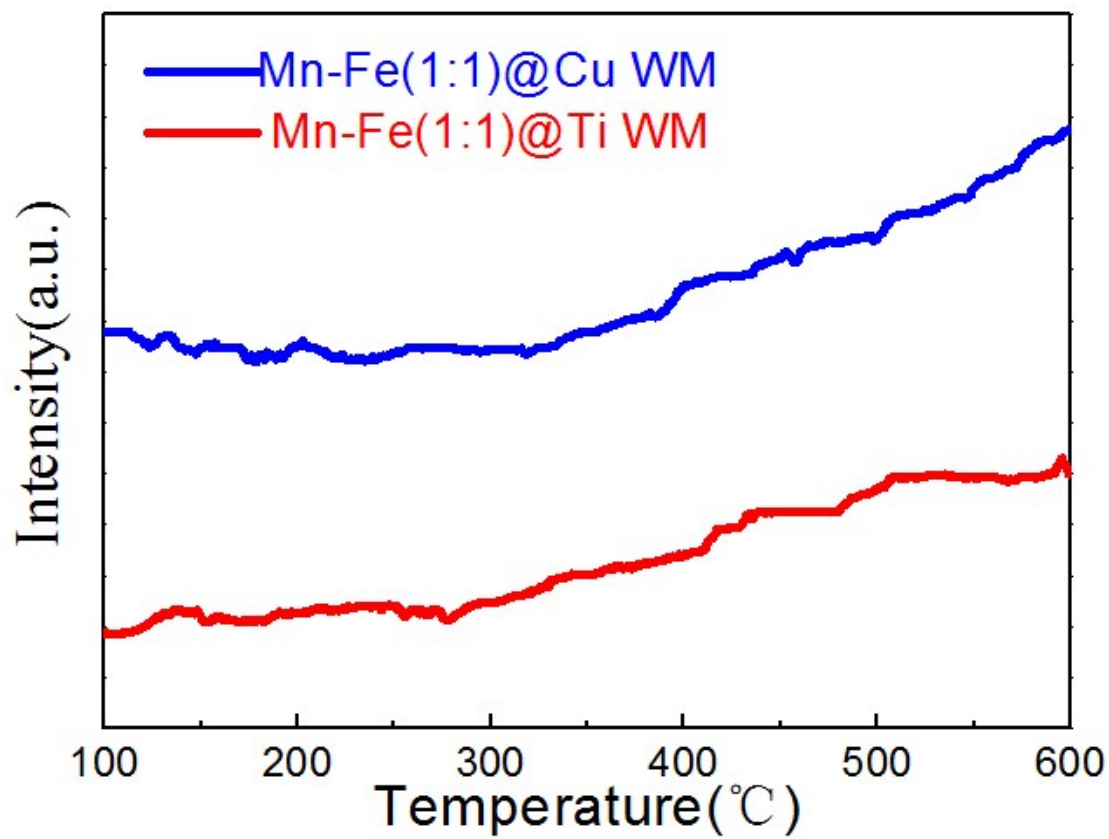

**Fig. S4** NH<sub>3</sub>-TPD profiles of Mn-Fe(1:1)@Cu WM and Mn-Fe(1:1)@Ti WM catalysts.

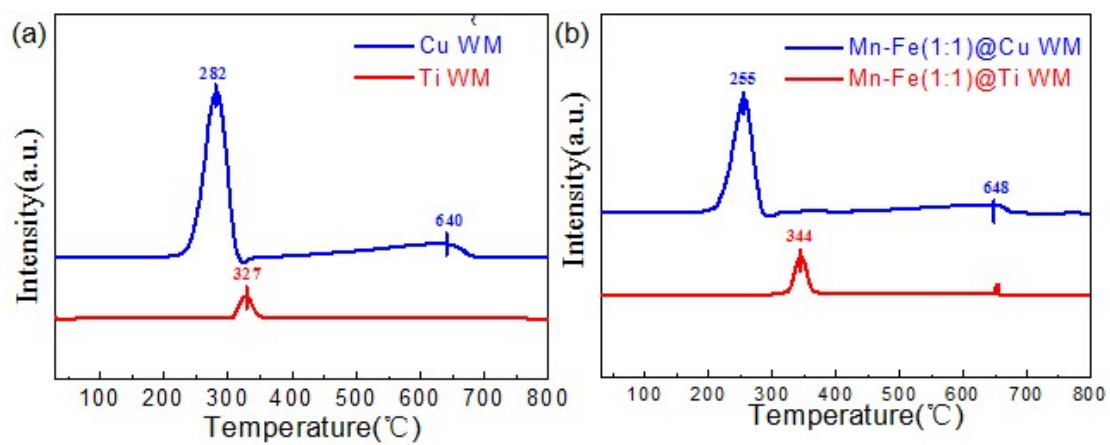

**Fig. S5** H<sub>2</sub>-TPR profiles of: (a) Cu WM and Ti WM; (b) Mn-Fe(1:1)@Cu WM and Mn-Fe(1:1)@Ti WM catalysts.

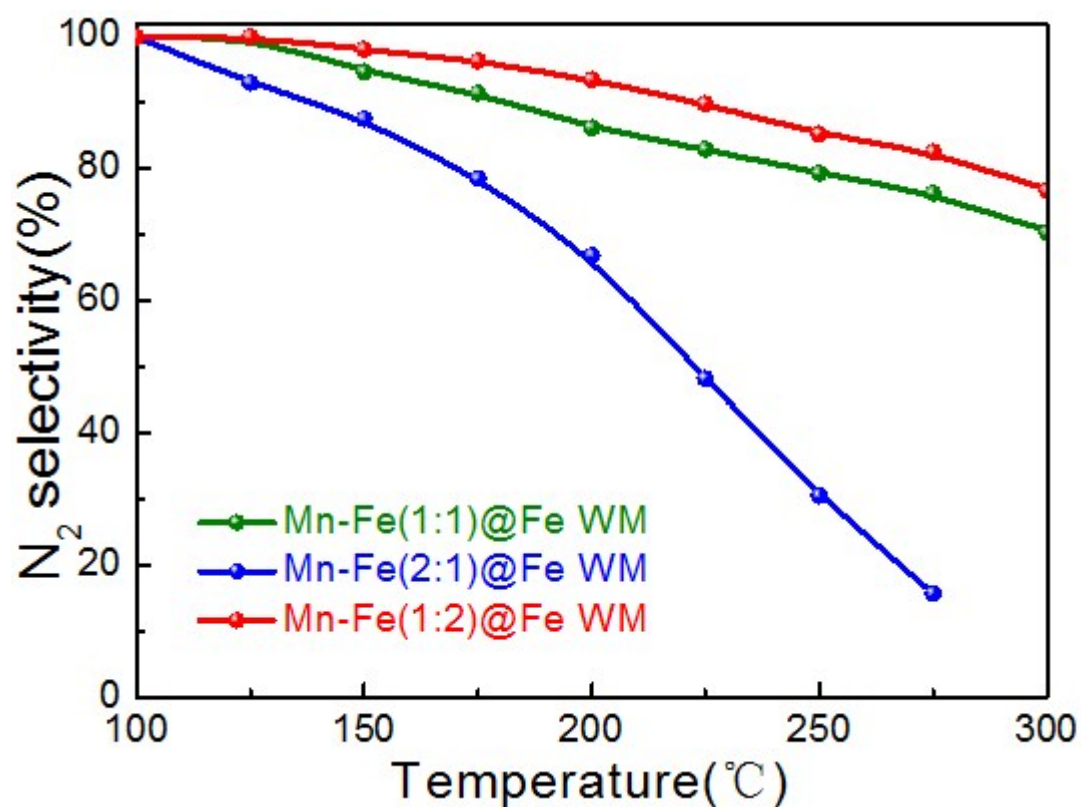

**Fig. S6** Plots of  $N_2$  selectivity *versus* temperature for the Mn-Fe@Fe WM catalysts. Reaction conditions:  $[NH_3] = [NO] = 500$  ppm,  $[O_2] = 3$  vol. %,  $N_2$  as balance gas, GHSV= 20000  $h^{-1}$ .

All the data points were collected in a steady state for 15 min at the corresponding temperature. In this case,  $N_2O$  adsorption on the surface of the catalyst has already reached saturation.

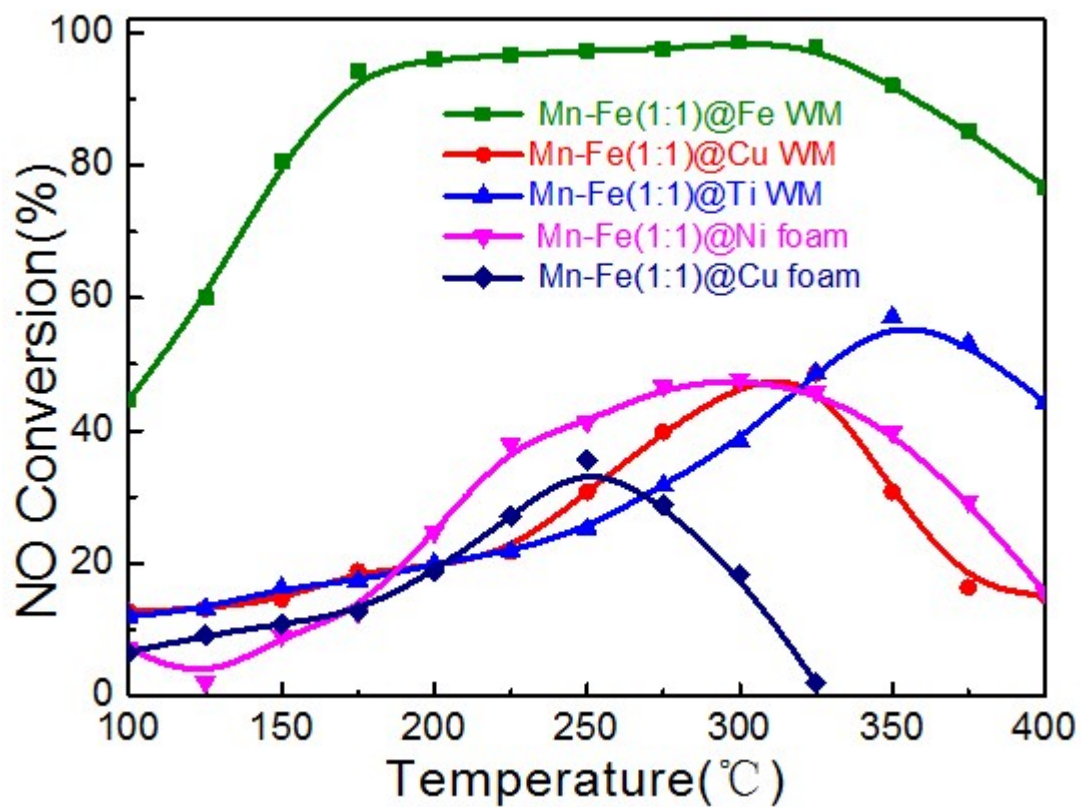

**Fig. S7** Plots of NO conversion *versus* reaction temperature over Mn-Fe(1:1)@Fe WM, Mn-Fe(1:1)@Cu WM, Mn-Fe(1:1)@ Ti WM, Mn-Fe(1:1)@Ni form and Mn-Fe(1:1)@Cu form catalysts.
